# Supplementary material for: Structure and function of the soil microbiome underlying N2O emissions from global wetlands
Source: PubMed Central journal article supplement (PMC8931052; doi:10.1038/s41467-022-29161-3), 2022-03-17
Supplement: 41467_2022_29161_MOESM3_ESM.pdf [file 41467_2022_29161_MOESM3_ESM.pdf]

## **Description of Additional Supplementary Files**

**Supplementary Data 1.** Samples used in this study.

**Supplementary Data 2.** Correlations between N<sub>2</sub>O emissions and the relative abundance of all genera uncovered by metagenomes.

**Supplementary Data 3.** List of archaeal OTUs showing strongest correlations to N<sub>2</sub>O fluxes.

**Supplementary Data 4.** Correlation between N<sub>2</sub>O fluxes and Archaeal OGs across global wetland soils.

**Supplementary Data 5.** Comparison between the functional gene profiles (MetaCyc and KEGG modules) of N<sub>2</sub>O taxa (determined using PacBio metabarcoding) that showed strongest positive and negative correlations with N<sub>2</sub>O production.

**Supplementary Data 6.** List of genomes that contain genes related to ammonia oxidation from a total of 91 archaeal and 116 bacterial genomes.

**Supplementary Data 7.** Analysis of MetaCyc nitrogen metabolism pathways in available Archaeal genomes in JGI as of 15-jul-2020.

**Supplementary Data 8.** Characteristics of qPCR primer pairs and programs used.
